# Supplementary material
Source: publisher figshare collection journal article supplement (https://tandf.figshare.com/ndownloader/files/20025995)
Supplement: Supplementary file 1 [file 20025995]

# ASIED: A Bayesian Adaptive Subgroup-Identification Enrichment Design (Supplementary Material)

## A Split rules for random partition model

Below we describe the split rules for determining a partition of the biomarker space using the example of two rounds of splits and various types of covariates, including continuous, binary, categorical, and ordinal variables.

1. In the first split, we select biomarker  $k$  with probability  $\nu_k$ ,  $k = 1, \dots, K$ , to split or not to split with probability  $\nu_0$ ,  $\sum_{k=0}^K \nu_k = 1$ . We assume  $\nu_k = \frac{1}{K+1}$ , indicating a uniform prior. Without loss of generality, we assume that  $x_{ik} \in (-1, 1)$  if the biomarker  $k$  is continuous. Then we choose threshold  $c_k$  to split the biomarker space into two subgroups  $U_k$  and  $L_k$ . The prior of  $p(c_k)$  differs depending on what type of variable the biomarker  $k$  is.

(a) If biomarker  $k$  is binary, the split will be deterministic and we denote  $U_k = \{i : x_{ik} = 0\}$  and  $L_k = \{i : x_{ik} = 1\}$ . Therefore  $p(c_k) = 1$ .

(b) If biomarker  $k$  is continuous, denote  $U_k = \{i : x_{ik} \leq c_k\}$  and  $L_k = \{i : x_{ik} > c_k\}$ . We assume  $p(c_k) = \text{Uniform}(-1, 1) = 1/2$ .

(c) If biomarker  $k$  is ordinal, let  $V_k$  denote the number of labels that biomarker  $k$  has. Let  $c_k$  denote the endpoint of the left partition, e.g., if  $V_k = 5$  and  $c_k = 3$ , the left partition is  $\{1, 2, 3\}$  and the right partition is  $\{4, 5\}$ . In this way we denote  $U_k = \{i : x_{ik} \leq c_k\}$  and  $L_k = \{i : x_{ik} > c_k\}$ . Moreover, if  $c_k = V_k$ , it is equivalent to not splitting, which has been considered with probability  $\nu_0$ . Therefore,  $p(c_k) = \frac{1}{V_k - 1}$ .

(d) If biomarker  $k$  is categorical, let  $V_k$  denote the number of categories corresponding to biomarker  $k$ . Let  $c_k$  denote the elements in one subset  $U_k$ . The remaining elements are stored in the other subset  $L_k$ . The  $c_k$  are elements of the powerset of  $\{1, 2, \dots, V_k\}$  without the empty-set or the full set. There are hence  $2^{V_k} - 2$  options for  $c_k$ . Note that the choice of  $c_k$  is symmetric: we may flip  $c_k$  and its complement, leading to the same partition. Thus,  $p(c_k) = \frac{2}{2^{V_k} - 2}$ .

2. In the second split, we assume that the number of available biomarkers is  $\tilde{K}$ . By available, we mean that the split rules would not lead to empty subgroup. For example, if a binary biomarker was used in the first round of split, then it would no longer be available for splitting at the following rounds of split.

In the subset  $U_k$ , we choose biomarker  $k_1$  with probability  $p(k_1)$  and threshold  $c_{k_1}$  to split the subgroup  $U_k$  into two subgroups  $UU_{kk_1}$  and  $UL_{kk_1}$ . In the subset  $L_k$ , we choose biomarker  $k_2$  with probability  $p(k_2)$  and threshold  $c_{k_2}$  to split the subgroup  $L_k$  into two subgroups  $LU_{kk_2}$  and  $LL_{kk_2}$ . Here,  $p(k_1), p(k_2), p(c_{k_1})$  and  $p(c_{k_2})$  differ depending on what type of variable the biomarker is and the values obtained for  $c_{k_1}$  and  $c_{k_2}$ .

(a) If biomarker  $k_1$  is continuous,  $p(k_1) = \frac{1}{K+1}$ . Denote  $UU_{kk_1} = \{i : \mathbf{x}_i \in U_k \text{ and } x_{ik_1} \leq c_{k_1}\}$  and  $UL_{kk_1} = \{i : \mathbf{x}_i \in U_k \text{ and } x_{ik_1} > c_{k_1}\}$ . We have  $p(c_{k_1}) = \frac{1}{2}$  if  $k_1 \neq k$ ;  $p(c_{k_1}) = \frac{1}{c_{k_1} + 1}$  if  $k_1 = k$ .

If biomarker  $k_2$  is continuous,  $p(k_2) = \frac{1}{K+1}$ . Denote  $LU_{kk_2} = \{i : \mathbf{x}_i \in L_k \text{ and } x_{ik_2} \leq$

$c_{k_2}\}$  and  $LL_{kk_2} = \{i : \mathbf{x}_i \in L_k \text{ and } x_{ik_2} > c_{k_2}\}$ . We have  $p(c_{k_2}) = \frac{1}{2}$  if  $k_2 \neq k$ ;  $p(c_{k_2}) = \frac{1}{1-c_k}$  if  $k_2 = k$ .

- (b) If  $k_1$  is binary and  $k_1 = k$ , then biomarker  $k_1$  is not an available biomarker to choose to split  $U_k$ . If  $k_1 \neq k$ , denote  $UU_{kk_1} = \{i : \mathbf{x}_i \in U_k, \text{ and } x_{ik_1} = 0\}$  and  $UL_{kk_1} = \{i : \mathbf{x}_i \in U_k, \text{ and } x_{ik_1} = 1\}$  with  $p(c_{k_1}) = 1$ .

If  $k_2$  is binary, and  $k_2 = k$ , then biomarker  $k_2$  is not an available biomarker to choose to split  $L_k$ . If  $k_2 \neq k$ , denote  $LU_{kk_2} = \{i : \mathbf{x}_i \in L_k, \text{ and } x_{ik_2} = 0\}$  and  $LL_{kk_2} = \{i : \mathbf{x}_i \in L_k, \text{ and } x_{ik_2} = 1\}$  with  $p(c_{k_2}) = 1$ .

- (c) If  $k_1$  is ordinal, we let  $c_{k_1}$  denote the left endpoint of the second split *within* the left partition, and if  $c_{k_2}$  is ordinal, we let  $c_{k_2}$  analogously denote the left endpoint *within* the right partition. We have  $p(c_{k_1}) = \frac{1}{V_{k_1}-1}$  if  $k_1 \neq k$ ;  $p(c_{k_1}) = \frac{1}{c_k}$  if  $k_1 = k$  and  $c_k > 1$ ;  $k_1$  is not an available biomarker to choose to split  $U_k$  if  $k_1 = k$  and  $c_k = 1$ . Also,  $p(c_{k_2}) = \frac{1}{V_{k_2}-1}$  if  $k_2 \neq k$ ;  $p(c_{k_2}) = \frac{1}{V_k - c_k}$  if  $k_2 = k$  and  $(V_k - c_k) > 1$ ;  $k_2$  is not an available biomarker to choose to split  $L_k$  if  $k_2 = k$  and  $V_k - c_k = 1$ .

- (d) If  $k_1$  is categorical, we let  $c_{k_1}$  denote one subset of the split *within* the subset  $U_k$ . If  $c_{k_2}$  is categorical, we let  $c_{k_2}$  denote one subset of the split *within* the subset  $L_k$ . We have  $p(c_{k_1}) = \frac{2}{2^{V_{k_1}}-2}$  if  $k_1 \neq k$ ;  $p(c_{k_1}) = \frac{2}{2^{|c_k|}-2}$  if  $k_1 = k$  and  $|c_k| > 1$ ;  $k_1$  is not an available biomarker to choose to split  $U_k$  if  $k_1 = k$  and  $|c_k| = 1$ . Also,  $p(c_{k_2}) = \frac{2}{2^{V_{k_2}}-2}$  if  $k_2 \neq k$ ;  $p(c_{k_2}) = \frac{2}{2^{V_k - |c_k|}-2}$  if  $k_2 = k$  and  $(V_k - |c_k|) > 1$ ;  $k_2$  is not an available biomarker to choose to split  $L_k$  if  $k_2 = k$  and  $(V_k - |c_k|) = 1$ .

## B Detailed MCMC derivations

Here we describe the detailed MCMC steps for binary outcomes and continuous outcomes. The MCMC derivations for categorical outcomes are similar to binary outcomes. Again, we take two rounds of splits for example. Assume we select biomarker  $k$  with probability  $p(k)$

and the threshold  $c_k$  in the first round, leading to two subsets  $U_k$  and  $L_k$  if we choose to split. Then we select biomarker  $k_1$  with threshold  $c_{k_1}$  to split  $U_k$  and biomarker  $k_2$  with threshold  $c_{k_2}$  to split  $L_k$ .

## B.1 Sampling model with priors

We first review the sampling models.

Binary outcomes. Let  $y_i \in \{0, 1\}$  and  $\theta_{t,m}$  be the response rate of patients in subgroup  $m$  under treatment  $t$ . In this case,  $\Theta = \{\theta_{t,m}\}$ . We assume

$$p(y_i = 1 \mid z_i = t, \Pi, \mathbf{x}_i \in S_m) = \theta_{t,m}.$$

The likelihood function is simply the product of  $n$  Bernoulli probability mass functions. We assign the prior  $\theta_{t,m} \mid \Pi \stackrel{iid}{\sim} \text{Beta}(a, b)$ , where  $\text{Beta}(a, b)$  denotes a beta distribution with mean  $a/(a + b)$ .

Continuous outcomes. Let  $y_i \in R$  and  $\theta_{t,m}$  be the mean response of patients in subgroup  $m$  under treatment  $t$ . We assume

$$p(y_i \mid z_i = t, \Pi, \mathbf{x}_i \in S_m) = N(\theta_{t,m}, \sigma^2).$$

The likelihood can be written as follows:

$$p(\mathbf{Y}_n \mid \mathbf{X}_n, \mathbf{Z}_n, \Theta, \Pi) = \prod_{t=1}^T \prod_{m=1}^M \prod_{\{i: z_i=t, \mathbf{x}_i \in S_m\}} (2\pi \sigma^2)^{-1/2} \exp\left\{-\frac{1}{2\sigma^2}(y_i - \theta_{t,m})^2\right\}. \quad (\text{B.1})$$

We assign the conjugate prior  $p(\theta_{t,m}, \sigma^2) = p(\theta_{t,m} \mid \sigma^2)p(\sigma^2)$  with  $p(\theta_{t,m} \mid \sigma^2) = N(\theta_0, \frac{\sigma^2}{\kappa_0})$  and  $p(\sigma^2) = IG(\frac{\nu_0}{2}, \frac{SS_0^2}{2})$ , where  $SS_0^2 = \nu_0 \sigma_0^2$ .

## B.2 MCMC steps

1. Update  $\theta_{t,m}$  (for both binary and continuous outcomes) and  $\sigma^2$  (for continuous outcome only).

- Binary outcome:

$$p(\theta_{t,m} \mid \cdot) \propto p(\mathbf{Y}_n \mid \mathbf{X}_n, \mathbf{Z}_n, \boldsymbol{\theta}, \Pi) p(\boldsymbol{\theta} \mid \Pi) \sim \text{beta}(n_{tm1} + a, n_{tm0} + b),$$

where  $n_{tmy} = \sum_i I(\mathbf{x}_i \in S_m, z_i = t, y_i = y)$ ,  $y = 0, 1$ .

- Continuous outcome:

$$p(\theta_{t,m} \mid \mathbf{Y}_n, \sigma^2, \mathbf{X}_n, \Pi) \propto p(\mathbf{Y}_n \mid \theta_{t,m}, \sigma^2, \Pi) p(\theta_{t,m}) \sim N\left(\frac{\sum y_i + \kappa_0 \theta_0}{n + \kappa_0}, \frac{\sigma^2}{n + \kappa_0}\right)$$

$$p(\sigma^2 \mid \mathbf{Y}_n, \boldsymbol{\theta}, \mathbf{X}_n, \Pi) \propto p(\mathbf{Y}_n \mid \boldsymbol{\theta}, \sigma^2, \Pi) p(\sigma^2) \sim IG\left(\frac{n + \nu_0}{2}, \frac{SS_0^2 + \sum_{t,m} \sum_{\mathbf{x}_i \in S_m} (y_i - \theta_{t,m})^2}{2}\right)$$

2. Keep the selected biomarkers  $k, k_1, k_2$  fixed, and update the thresholds  $c_k, c_{k_1}, c_{k_2}$ .

Assume the current value is  $\beta_k = (c_k, c_{k_1}, c_{k_2})$  and the new value  $\beta_k^* = (c_k^*, c_{k_1}^*, c_{k_2}^*)$  is generated from a proposal distribution  $q(\beta_k^* \mid \beta_k)$ . Denote the partition determined by  $k, k_1, k_2, c_k^*, c_{k_1}^*, c_{k_2}^*$  to be  $\Pi^*$ . The acceptance ratio  $r$  is

$$\begin{aligned} r &= \frac{p(\mathbf{Y}_n \mid \mathbf{X}_n, \mathbf{Z}_n, \boldsymbol{\theta}, \Pi^*) p(\boldsymbol{\theta} \mid \Pi^*) p(\Pi^* \mid k, k_1, k_2, \beta_k^*) p(\beta_k^*)}{p(\mathbf{Y}_n \mid \mathbf{X}_n, \mathbf{Z}_n, \boldsymbol{\theta}, \Pi) p(\boldsymbol{\theta} \mid \Pi) p(\Pi \mid k, k_1, k_2, \beta_k) p(\beta_k)} \cdot \frac{q(\beta_k \mid \beta_k^*)}{q(\beta_k^* \mid \beta_k)} \\ &= \frac{p(\mathbf{Y}_n \mid \mathbf{X}_n, \mathbf{Z}_n, \boldsymbol{\theta}, \Pi^*) p(\boldsymbol{\theta} \mid \Pi^*) p(c_k^* \mid k) p(c_{k_1}^* \mid k, c_k^*, k_1) p(c_{k_2}^* \mid k, c_k^*, k_2)}{p(\mathbf{Y}_n \mid \mathbf{X}_n, \mathbf{Z}_n, \boldsymbol{\theta}, \Pi) p(\boldsymbol{\theta} \mid \Pi) p(c_k \mid k) p(c_{k_1} \mid k, c_k, k_1) p(c_{k_2} \mid k, c_k, k_2)} \cdot \frac{q(\beta_k \mid \beta_k^*)}{q(\beta_k^* \mid \beta_k)} \end{aligned} \quad (\text{B.2})$$

3. Update both the selected biomarkers in two rounds of splits  $k, k_1, k_2$ , and the corre-

sponding thresholds  $c_k, c_{k_1}, c_{k_2}$ . Note here we allow not to split with certain probability in each split.

Due to the possibility of not splitting, updating  $k, k_1, k_2$  leads to potential dimension change due to the change of the number of subgroups. For computational efficiency and simplicity, in Metropolis-Hasting step we choose a specific proposal distribution that is the same as the prior, to generate the new value. That means, we sample the new  $k^*, k_1^*, k_2^*$  and the corresponding  $\beta_{k^*} = (c_{k^*}, c_{k_1^*}, c_{k_2^*})$  from the prior as the proposed value, then determine if we accept it or not.

Denote the partition determined by  $k, k_1, k_2, c_k^*, c_{k_1}^*, c_{k_2}^*$  to be  $\Pi^*$ . Then the acceptance ratio  $r$  is reduced to the following form:

$$\begin{aligned}
r &= \frac{p(\mathbf{Y}_n | \mathbf{X}_n, \mathbf{Z}_n, \boldsymbol{\theta}, \Pi^*) p(\boldsymbol{\theta} | \Pi^*) p(\Pi^*)}{p(\mathbf{Y}_n | \mathbf{X}_n, \mathbf{Z}_n, \boldsymbol{\theta}, \Pi) p(\boldsymbol{\theta} | \Pi) p(\Pi)} \cdot \frac{q(\Pi | \Pi^*)}{q(\Pi^* | \Pi)} \\
&= \frac{p(\mathbf{Y}_n | \mathbf{X}_n, \mathbf{Z}_n, \boldsymbol{\theta}, \Pi^*) p(\boldsymbol{\theta} | \Pi^*) p(\Pi^*)}{p(\mathbf{Y}_n | \mathbf{X}_n, \mathbf{Z}_n, \boldsymbol{\theta}, \Pi) p(\boldsymbol{\theta} | \Pi) p(\Pi)} \cdot \frac{p(\Pi)}{p(\Pi^*)} \\
&= \frac{p(\mathbf{Y}_n | \mathbf{X}_n, \mathbf{Z}_n, \boldsymbol{\theta}, \Pi^*) p(\boldsymbol{\theta} | \Pi^*)}{p(\mathbf{Y}_n | \mathbf{X}_n, \mathbf{Z}_n, \boldsymbol{\theta}, \Pi) p(\boldsymbol{\theta} | \Pi)} \tag{B.3}
\end{aligned}$$

Both (B.2) and (B.3) can be computed for binary outcome and continuous outcome by plugging the sampling model and the priors of binary outcome and continuous outcome, respectively.

## C Determining $\xi_1$ and $\xi_2$

Table S1: Sensitivity analysis of the proposed ASIED design with respect to  $\xi_1$  and  $\xi_2$  in the first interim analysis ( $n = 100$ ), under different  $\beta_0$  values.  $Pr(All)$  denotes the probability of continuing the trial with original population until the end of the trial.  $Pr(Sub)$  denotes the probability of continuing the trial with an enriched subpopulation until the end of the trial.  $Pr(EarS)$  denotes the probability of stopping the trial due to futility.  $Pr(2All)$  denotes the probability of continuing the trial with original population and plan a second interim analysis.  $Pr(2Sub)$  denotes the probability of continuing the trial with an enriched subpopulation and plan a second interim analysis. All probabilities are with respect to repeated simulations.

| $\xi_2 = 0.05$ | $\beta_0 = 0.25$<br>$\beta_1 = 2$<br>No Effect | $\beta_0 = 0.25$<br>$\beta_1 = 2.55$<br>Sub LRV | $\beta_0 = 0.25$<br>$\beta_1 = 2.83$<br>Sub TV | $\beta_0 = 2.6$<br>$\beta_1 = 0$<br>All LRV | $\beta_0 = 3.08$<br>$\beta_1 = 0$<br>All TV |
|----------------|------------------------------------------------|-------------------------------------------------|------------------------------------------------|---------------------------------------------|---------------------------------------------|
| $\xi_1 = 0.80$ |                                                |                                                 |                                                |                                             |                                             |
| $Pr(All)$      | 0                                              | 0                                               | 10                                             | 95                                          | 100                                         |
| $Pr(Sub)$      | 1                                              | 96                                              | 90                                             | 0                                           | 0                                           |
| $Pr(EarS)$     | 99                                             | 4                                               | 0                                              | 5                                           | 0                                           |
| $Pr(2All)$     | 0                                              | 0                                               | 0                                              | 0                                           | 0                                           |
| $Pr(2Sub)$     | 0                                              | 0                                               | 0                                              | 0                                           | 0                                           |
| $\xi_1 = 0.85$ |                                                |                                                 |                                                |                                             |                                             |
| $Pr(All)$      | 0                                              | 0                                               | 8                                              | 95                                          | 100                                         |
| $Pr(Sub)$      | 0                                              | 92                                              | 91                                             | 0                                           | 0                                           |
| $Pr(EarS)$     | 100                                            | 7                                               | 0                                              | 5                                           | 0                                           |
| $Pr(2All)$     | 0                                              | 0                                               | 0                                              | 0                                           | 0                                           |
| $Pr(2Sub)$     | 0                                              | 1                                               | 1                                              | 0                                           | 0                                           |
| $\xi_1 = 0.90$ |                                                |                                                 |                                                |                                             |                                             |
| $Pr(All)$      | 0                                              | 0                                               | 6                                              | 92                                          | 100                                         |
| $Pr(Sub)$      | 0                                              | 88                                              | 90                                             | 0                                           | 0                                           |
| $Pr(EarS)$     | 100                                            | 7                                               | 0                                              | 5                                           | 0                                           |
| $Pr(2All)$     | 0                                              | 0                                               | 0                                              | 3                                           | 0                                           |
| $Pr(2Sub)$     | 0                                              | 5                                               | 4                                              | 0                                           | 0                                           |

| $\xi_2 = 0.10$ | $\beta_0 = 0.25$ | $\beta_0 = 0.25$ | $\beta_0 = 0.25$ | $\beta_0 = 2.6$ | $\beta_0 = 3.08$ |
|----------------|------------------|------------------|------------------|-----------------|------------------|
|                | $\beta_1 = 2$    | $\beta_1 = 2.55$ | $\beta_1 = 2.83$ | $\beta_1 = 0$   | $\beta_1 = 0$    |
|                | No Effect        | Sub LRV          | Sub TV           | All LRV         | All TV           |
| $\xi_1 = 0.80$ |                  |                  |                  |                 |                  |
| $Pr(All)$      | 0                | 0                | 10               | 95              | 100              |
| $Pr(Sub)$      | 1                | 96               | 90               | 0               | 0                |
| $Pr(EarS)$     | 99               | 4                | 0                | 5               | 0                |
| $Pr(2All)$     | 0                | 0                | 0                | 0               | 0                |
| $Pr(2Sub)$     | 0                | 0                | 0                | 0               | 0                |
| $\xi_1 = 0.85$ |                  |                  |                  |                 |                  |
| $Pr(All)$      | 0                | 0                | 9                | 95              | 100              |
| $Pr(Sub)$      | 0                | 92               | 91               | 0               | 0                |
| $Pr(EarS)$     | 100              | 8                | 0                | 5               | 0                |
| $Pr(2All)$     | 0                | 0                | 0                | 0               | 0                |
| $Pr(2Sub)$     | 0                | 0                | 0                | 0               | 0                |
| $\xi_1 = 0.90$ |                  |                  |                  |                 |                  |
| $Pr(All)$      | 0                | 0                | 8                | 95              | 100              |
| $Pr(Sub)$      | 0                | 89               | 91               | 0               | 0                |
| $Pr(EarS)$     | 100              | 11               | 0                | 5               | 0                |
| $Pr(2All)$     | 0                | 0                | 0                | 0               | 0                |
| $Pr(2Sub)$     | 0                | 0                | 1                | 0               | 0                |

Since we set the three risks as false stop risk=0.05, false go risk=0.1, and false enrich risk=0.15, both  $\xi_1 = 0.8$ ,  $\xi_2 = 0.05$  and  $\xi_1 = 0.8$ ,  $\xi_2 = 0.1$  achieve the desirable results. Usually pharmaceutical companies want to be more stringent on false go in early phase drug development, we determine  $\xi_2 = 0.1$ .



## D Additional Simulation Study

In this section, we considered one more scenario in which there is no predictive biomarker and one prognostic biomarker to evaluate the performance of the proposed Bayesian random partition (BayRP) model . We assumed all the biomarkers were continuous and generated  $x_{ik}$  from  $\text{Uniform}(-1, 1)$ ,  $i = 1, \dots, n$  and  $k = 1, \dots, 4$ . In this scenario, we assumed only the first biomarker was the prognostic biomarker and generated  $y_i = 0.75 + 3.25I(z_i = 2) + 0.25I(x_{i1} > -0.4) + \epsilon_i$ , where  $\epsilon_i \sim N(0, 1)$ . Remember that we defined the true effective subgroup as  $S^o = \{i : [E(y_i \mid z_i = 2, \mathbf{x}_i) - E(y_i \mid z_i = 1, \mathbf{x}_i)] > \text{LRV}\}$ , where  $\text{LRV}=2.37$ . In this scenario, the simulated true effective subgroup includes all-comers.

We simulated 100 trials for this scenario and applied the BayRP to each simulated dataset. BayRP successfully identified the all-comers as the effective group, and yielded the true positive rate being 0.96. Note that we do not report the true negative rate since the simulated true effective subgroup include all-comers, meaning that the denominator in the definition of the true negative rate is 0.
